# Supplementary material
Source: PubMed Central journal article supplement (PMC8589867)
Supplement: NIHMS1703999-supplement-1.pdf [file NIHMS1703999-supplement-1.pdf]

## Supplementary Figure Legends

**Figure S1:** Flow of subjects and the comparisons used for analysis. CHE: covert hepatic encephalopathy, OHE: overt hepatic encephalopathy

**Figure S2:** Individual data plot of correlation between number of cognitive tests abnormal and number of weekly bowel movements (BMs) and regression fits for patients without prior overt HE (solid line) and those with prior OHE (dashed line). Open circles are patients with prior OHE while diamonds are those without prior OHE.

**Figure S1**

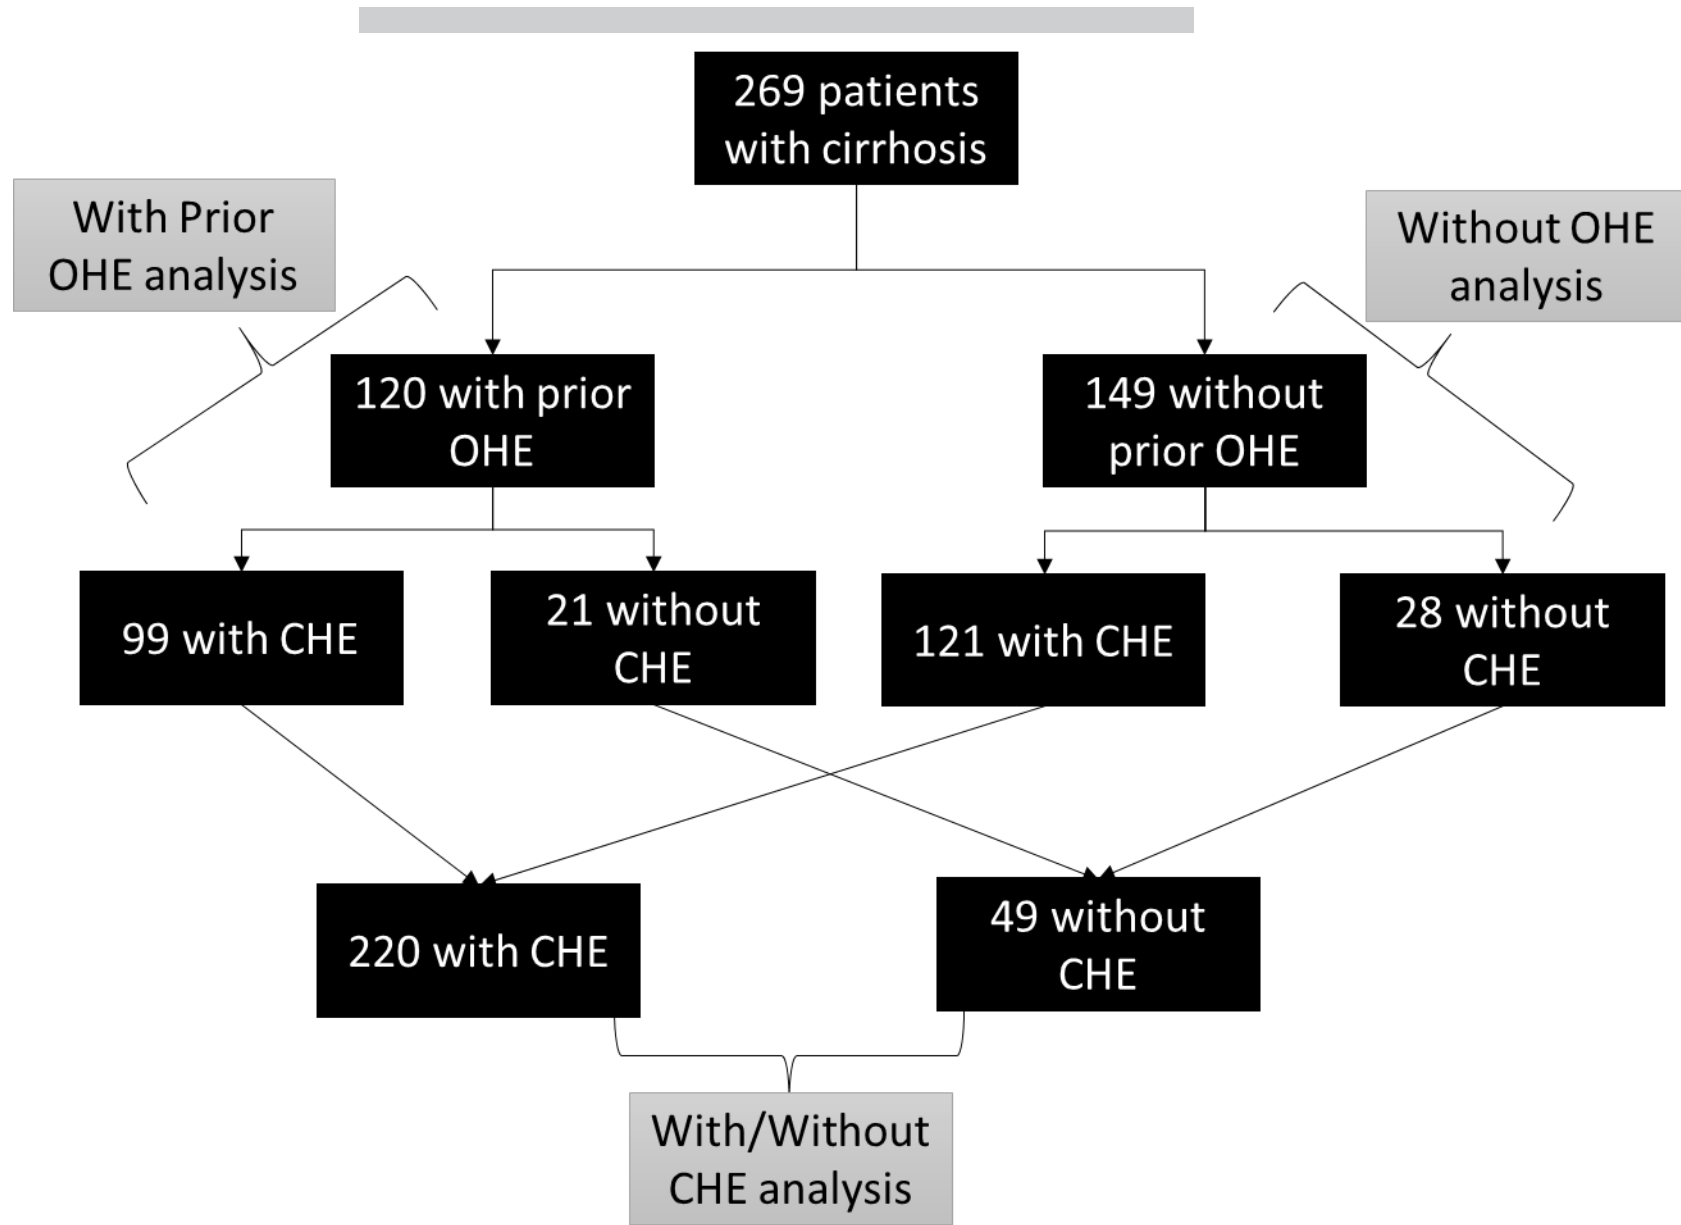

Figure S2

### Correlation of Cognitive Tests with BM Frequency by OHE status

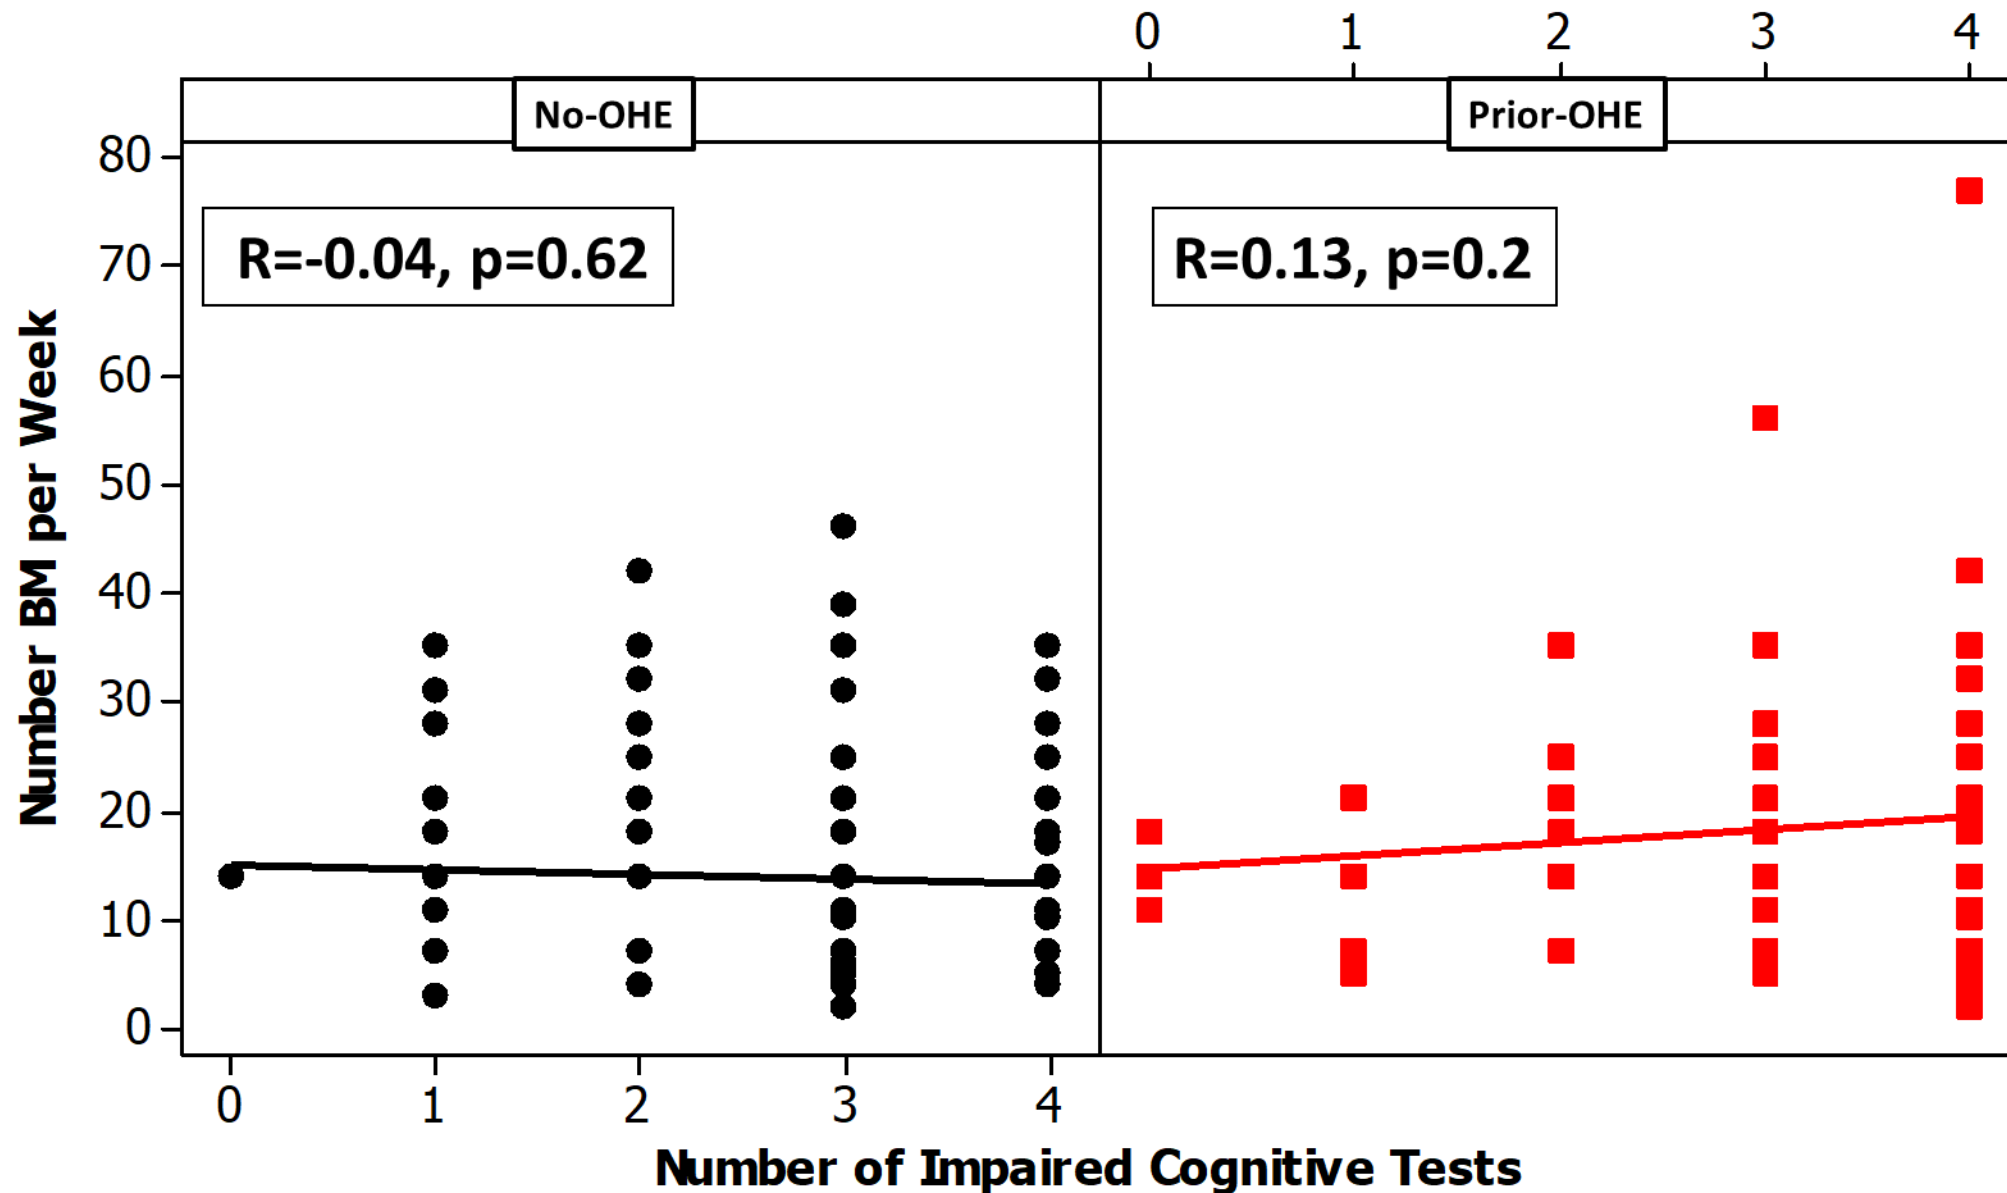

Table S1: Comparison of Patients with 2-3 daily bowel movements (14-21 weekly BMs) to those without

| Variables                             | Patients with 2-3 daily BMs |               |         |
|---------------------------------------|-----------------------------|---------------|---------|
|                                       | No (n=145)                  | Yes (n=124)   | P value |
| Age                                   | 59.5.2±7.2                  | 58.7±7.4      | 0.34    |
| Men (%)                               | 132                         | 115           | 0.35    |
| Alcohol etiology (%)                  | 31                          | 36            | 0.15    |
| MELD score                            | 12.3±5.9                    | 13.2±5.2      | 0.08    |
| Opioid Use                            | 47                          | 30            | 0.10    |
| Stool softeners                       | 23                          | 28            | 0.16    |
| Prior Overt HE (%)                    | 58                          | 62            | 0.015   |
| Covert HE                             | 118                         | 102           | 0.12    |
| NCT-A (sec)                           | 50.5±25.2                   | 49.8±28.2     | 0.82    |
| NCT-B (sec)                           | 153±101                     | 139±95.3      | 0.26    |
| DST (number)                          | 44.0±14.0                   | 43.7±14.5     | 0.86    |
| BDT (number)                          | 23.2±12.3                   | 25.5±14.0     | 0.2     |
| Number of tests impaired<br>0/1/2/3/4 | 3/24/21/44/53               | 6/16/29/28/45 | 0.11    |
| None/lactulose/rifaximin/both         | 10/8/32/95/50               | 19/9/42/54/70 | 0.64    |
